# Supplementary material for: Internal Versus External Motivation in Referral of Primary Care Patients with Depression to an Internet Support Group: Randomized Controlled Trial
Source: J Med Internet Res. 2013 Mar 12;15(3):e42. doi: 10.2196/jmir.2197 (PMC3636270; doi:10.2196/jmir.2197)
Supplement: Supplementary file 1 [file jmir_v15i3e42_app1.pdf]

## Multimedia Appendix 1

**Figure 1.** Neutral Motivation Group Card

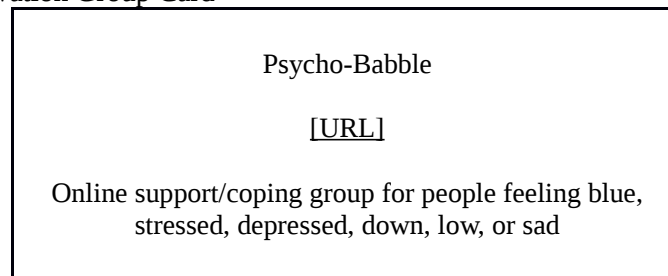

**Figure 2.** Internal Motivation Group Brochure

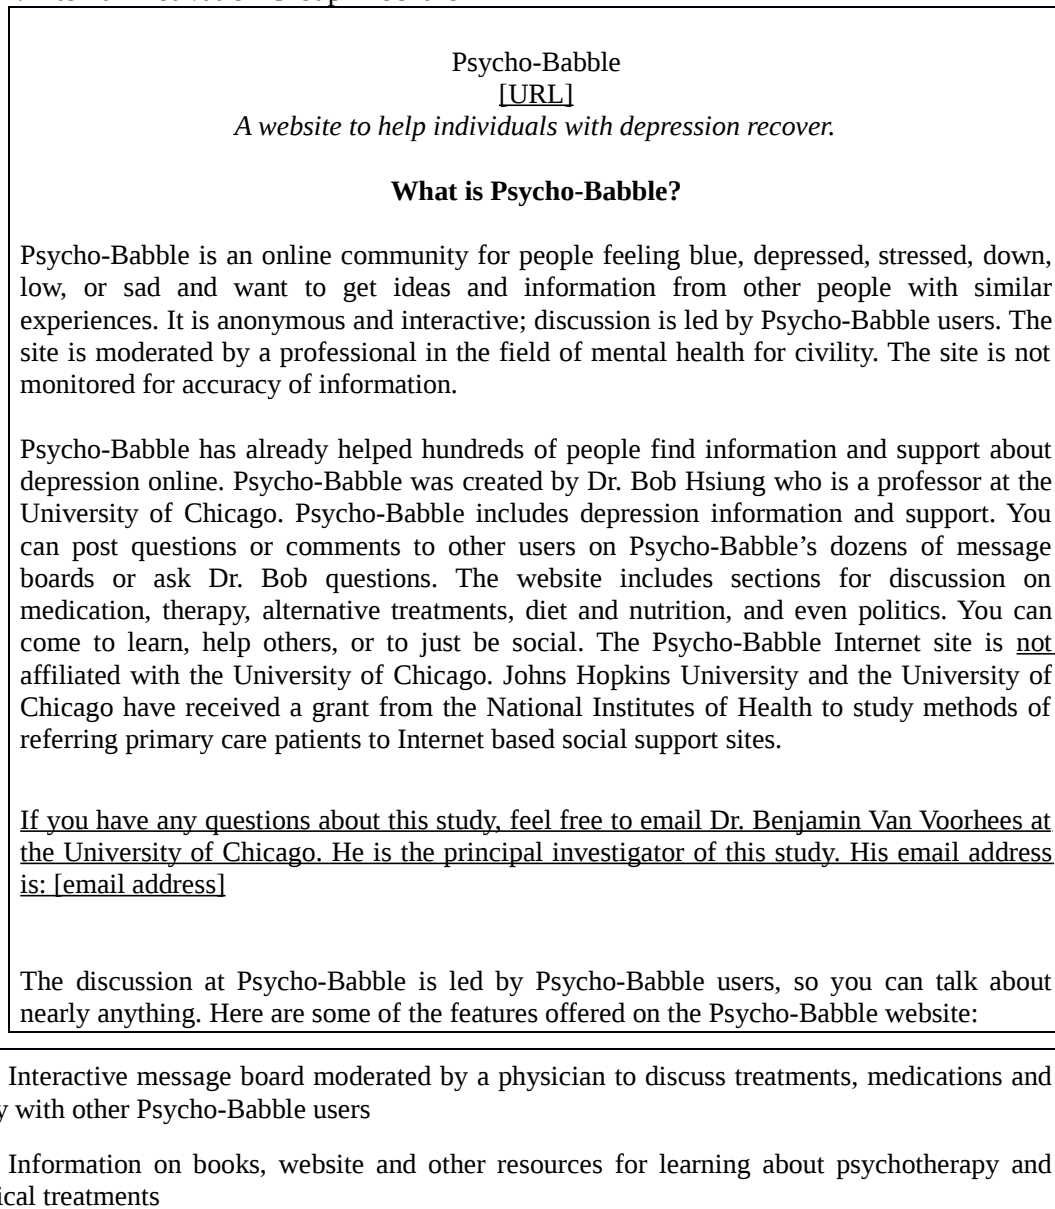

- Social support network for discussing a wide range of issues like faith, health and wellness, grief and mourning and alternative treatments.

**Read what some users have said about the site**

*“This board helps me feel not alone, which is so important to me. If that is the only purpose it serves, well, that sometimes is more helpful to me than a lot of the meds.”*

*“The board helps a lot in that I can feel a little connected to people who are also suffering, people who don't know me, won't judge me, and who have some darn good advice. After my long battles with mental illness and all the meds I've been on, I feel that I have something of value to offer, and it makes me feel good to pass it on.”*

**Check out Psycho-Babble today! It's easy, it's fast, and you may just get an answer to that one difficult question or make a few friends.**

Your personal username and password are: [username, password]

Once you log on you will be directed to create your own password

**Figure 3.** External Motivation Group Letter

RE: Internet Depression Support Group Study

Dear [participant name],

I am writing you to thank you for participating in the study “Feasibility Study of Methods of Referral Primary Care Patients with Depression for Internet-Based Social Support”.

I want to encourage you to visit the Psycho-Babble Internet site. I believe you may find the experience of visiting the internet site helpful for you. This Internet site has been designed to be an online support group for people feeling blue, depressed, stressed, down, low, or sad. We hope that you will find information that will help you determine if and what form of treatment you need. Similarly, we hope you find the stories and comments of others who have had similar problems to be encouraging and helpful. Additionally, your comments may be helpful to others.

Please feel free to talk to me or the study staff or the study principal investigator, Dr. Benjamin W. Van Voorhees if you have any questions. The internet site address is: [URL].

Sincerely,

[doctor name], MD

**Table 1.** Randomization Groups and Participation

|                                                   | <b>Neutral- Card (A)</b> |                         |           | <b>Internal -Brochure (B)</b> |                                    |           |                           |                           |
|---------------------------------------------------|--------------------------|-------------------------|-----------|-------------------------------|------------------------------------|-----------|---------------------------|---------------------------|
|                                                   |                          | Mean/<br>(Percent)      | SD<br>(N) |                               | Mean/<br>(Percent)                 | SD<br>(N) | 2-group<br><i>p-value</i> | 3-group<br><i>p-value</i> |
|                                                   | <i>N</i>                 |                         |           | <i>N</i>                      |                                    |           |                           |                           |
| <b>Sessions</b>                                   |                          |                         |           |                               |                                    |           |                           |                           |
| Number of sessions                                | <sup>1</sup><br>8        | 1.33                    | 2.11      | 19                            | 2.95                               | 5.92      | .26                       | .33                       |
| Percent of those with at least one session        | <sup>1</sup><br>8        | 0.04                    | 0.07      | 19                            | 0.10                               | 0.19      | .26                       | .33                       |
| <b>Time</b>                                       |                          |                         |           |                               |                                    |           |                           |                           |
| Total Time                                        | <sup>1</sup><br>8        | 115.44                  | 333.36    | 19                            | 74.68                              | 228.13    | .25                       | .17                       |
| Minutes logged (Portal)                           | <sup>1</sup><br>8        | 106.22                  | 324.07    | 19                            | 56.21                              | 175.66    | .26                       | .24                       |
| Minutes logged (ISG)                              | <sup>1</sup><br>8        | 9.27                    | 26.59     | 19                            | 18.47                              | 53.24     | .92                       | .20                       |
| Minutes per each participant                      | <sup>1</sup><br>8        | 0.05                    | 0.07      | 19                            | 0.07                               | 0.07      | .25                       | .17                       |
| <b>Time &amp; Sessions</b>                        |                          |                         |           |                               |                                    |           |                           |                           |
| Minutes per session                               | <sup>1</sup><br>8        | 20.86                   | 61.83     | 18                            | 7.61                               | 11.82     | .40                       | .31                       |
| <b>Viewing</b>                                    |                          |                         |           |                               |                                    |           |                           |                           |
| Post viewed                                       | <sup>1</sup><br>8        | 5.61                    | 11.75     | 19                            | 21.58                              | 40.40     | .21                       | .49                       |
| Percent who viewed at least once                  | <sup>1</sup><br>8        | (44.44)                 | (8)       | 19                            | (587.89)                           | (11)      | .41                       | .68                       |
| Post viewed by each participant who registered    | <sup>1</sup><br>8        | 0.21                    | 0.44      | 19                            | 0.80                               | 1.50      | .21                       | .49                       |
| Boards viewed                                     | <sup>1</sup><br>8        | 1.11                    | 1.68      | 19                            | 1.53                               | 1.87      | .36                       | .52                       |
| Boards viewed by each participant who registered  | <sup>1</sup><br>8        | 0.04                    | 0.06      | 19                            | 0.06                               | 0.07      | .36                       | .52                       |
| <b>Posting</b>                                    |                          |                         |           |                               |                                    |           |                           |                           |
| Data Submitted                                    | <sup>1</sup><br>8        | 0.39                    | 1.65      | 19                            | 7.53                               | 15.09     | .01                       | .10                       |
| Post attempted                                    | <sup>1</sup><br>8        | 0.17                    | 0.71      | 19                            | 5.21                               | 11.54     | .02                       | .17                       |
| Percent of those who attempted at least once      | <sup>1</sup><br>8        | (65.56)                 | (1)       | 19                            | (42.11)                            | (2)       | .02                       | .02                       |
| Post attempted by each participant who registered | <sup>1</sup><br>8        | 0.01                    | 0.03      | 19                            | 0.19                               | 0.43      | .02                       | .17                       |
| Post posted                                       | <sup>1</sup><br>8        | 0.33                    | 1.41      | 19                            | 0.26                               | 0.93      | .63                       | .89                       |
| Percent of those who posted at least once (ISG)   | <sup>1</sup><br>8        | (65.56)                 | (1)       | 19                            | (110.53)                           | (2)       | 1.00                      | .77                       |
| Posts posted by each participant (ISG)            | <sup>1</sup><br>8        | 0.01                    | 0.05      | 19                            | 0.01                               | 0.03      | .63                       | .89                       |
| <b>Visitation of Portal &amp; ISG</b>             |                          |                         |           |                               |                                    |           |                           |                           |
| Visited Portal or ISG                             | <sup>1</sup><br>8        | (565.56)                | (10)      | 19                            | (798.95)                           | (15)      | .13                       | .13                       |
| Participants who visited Portal                   | <sup>1</sup><br>8        | (565.56)                | (10)      | 19                            | (743.68)                           | (14)      | .25                       | .26                       |
| Participants who registered ISG                   | <sup>1</sup><br>8        | (565.56)                | (10)      | 19                            | (587.89)                           | (11)      | .89                       | .80                       |
|                                                   |                          |                         |           |                               |                                    |           |                           |                           |
|                                                   |                          | <b>Neutral Card (A)</b> |           |                               | <b>External Recommendation (C)</b> |           |                           |                           |
|                                                   |                          | Mean/<br>(Percent)      | SD<br>(N) |                               | Mean/<br>(Percent)                 | SD<br>(N) | 2-group<br><i>p-value</i> |                           |
|                                                   | <i>N</i>                 |                         |           | <i>N</i>                      |                                    |           |                           |                           |

|                                                   |                                                     |           |        |                                      |           |        |                |  |
|---------------------------------------------------|-----------------------------------------------------|-----------|--------|--------------------------------------|-----------|--------|----------------|--|
| <b>Sessions</b>                                   |                                                     |           |        |                                      |           |        |                |  |
| Number of sessions                                | $\frac{1}{8}$                                       | 1.33      | 2.11   | 13                                   | 0.92      | 1.44   | .65            |  |
| Percent of those in sessions                      | $\frac{1}{8}$                                       | 0.04      | 0.07   | 13                                   | 0.03      | 0.05   | .65            |  |
| <b>Time</b>                                       |                                                     |           |        |                                      |           |        |                |  |
| Total Time                                        | $\frac{1}{8}$                                       | 115.44    | 333.36 | 13                                   | 4.50      | 8.63   | .51            |  |
| Minutes logged (Portal)                           | $\frac{1}{8}$                                       | 106.22    | 324.07 | 13                                   | 4.08      | 8.30   | .51            |  |
| Minutes logged (ISG)                              | $\frac{1}{8}$                                       | 9.27      | 26.59  | 13                                   | 0.23      | 0.60   | <b>.04</b>     |  |
| Minutes per each participant                      | $\frac{1}{8}$                                       | 0.05      | 0.07   | 13                                   | 0.03      | 0.04   | .41            |  |
| <b>Time &amp; Sessions</b>                        |                                                     |           |        |                                      |           |        |                |  |
| Minutes used per session                          | $\frac{1}{8}$                                       | 20.86     | 61.83  | 13                                   | 3.75      | 8.37   | .48            |  |
| <b>Viewing</b>                                    |                                                     |           |        |                                      |           |        |                |  |
| Post viewed                                       | $\frac{1}{8}$                                       | 5.61      | 11.75  | 13                                   | 4.00      | 5.74   | .60            |  |
| Percent who viewed at least once                  | $\frac{1}{8}$                                       | (44.44)   | (8)    | 13                                   | (46.15)   | (6)    | .93            |  |
| Post viewed by each participant who registered    | $\frac{1}{8}$                                       | 0.21      | 0.44   | 13                                   | 0.15      | 0.21   | .60            |  |
| Boards viewed                                     | $\frac{1}{8}$                                       | 1.11      | 1.68   | 13                                   | 0.69      | 0.85   | .76            |  |
| Boards viewed by each participant who registered  | $\frac{1}{8}$                                       | 0.04      | 0.06   | 13                                   | 0.03      | 0.03   | .76            |  |
| <b>Posting</b>                                    |                                                     |           |        |                                      |           |        |                |  |
| Data Submitted                                    | $\frac{1}{8}$                                       | 0.39      | 1.65   | 13                                   | 0.54      | 1.94   | .81            |  |
| Post attempted                                    | $\frac{1}{8}$                                       | 0.17      | 0.71   | 13                                   | 0.23      | 0.83   | .81            |  |
| Percent of those who attempted at least once      | $\frac{1}{8}$                                       | (65.56)   | (1)    | 13                                   | (87.69)   | (1)    | 1.00           |  |
| Post attempted by each participant who registered | $\frac{1}{8}$                                       | 0.01      | 0.03   | 13                                   | 0.01      | 0.03   | .81            |  |
| Post posted                                       | $\frac{1}{8}$                                       | 0.33      | 1.41   | 13                                   | 0.00      | 0.00   | .40            |  |
| Percent of those who posted at least once (ISG)   | $\frac{1}{8}$                                       | (65.56)   | (1)    | 13                                   | (0.00)    | (0)    | 1.00           |  |
| Posts posted by each participant (ISG)            | $\frac{1}{8}$                                       | 0.01      | 0.05   | 13                                   | 0.00      | 0.00   | .40            |  |
| <b>Portal &amp; ISG</b>                           |                                                     |           |        |                                      |           |        |                |  |
| Visited Portal or Registered ISG                  | $\frac{1}{8}$                                       | (55.566)  | (10)   | 13                                   | (46.156)  | (6)    | .61            |  |
| Participants who visited Portal                   | $\frac{1}{8}$                                       | (55.566)  | (10)   | 13                                   | (46.156)  | (6)    | .61            |  |
| Participants who registered ISG                   | $\frac{1}{8}$                                       | (55.566)  | (10)   | 13                                   | (46.156)  | (6)    | .61            |  |
|                                                   | <b><u>External Recommendation</u></b><br><b>(C)</b> |           |        | <b><u>Internal -Brochure (B)</u></b> |           |        |                |  |
|                                                   |                                                     | Mean/     | SD     |                                      | Mean/     | SD     | 2-group        |  |
|                                                   | <i>N</i>                                            | (Percent) | (N)    | <i>N</i>                             | (Percent) | (N)    | <i>p-value</i> |  |
| <b>Sessions</b>                                   |                                                     |           |        |                                      |           |        |                |  |
| Number of sessions                                | $\frac{1}{3}$                                       | 0.92      | 1.44   | 19                                   | 2.95      | 5.92   | .15            |  |
| Percent of those in sessions                      | $\frac{1}{3}$                                       | 0.03      | 0.05   | 19                                   | 0.10      | 0.19   | .15            |  |
| <b>Time</b>                                       |                                                     |           |        |                                      |           |        |                |  |
| Total Time                                        | $\frac{1}{3}$                                       | 4.50      | 8.63   | 19                                   | 74.68     | 228.13 | .08            |  |
| Minutes logged (Portal)                           | $\frac{1}{3}$                                       | 4.08      | 8.30   | 19                                   | 56.21     | 175.66 | .09            |  |

|                                                   |               |          |      |    |          |       |      |  |
|---------------------------------------------------|---------------|----------|------|----|----------|-------|------|--|
| Minutes logged (ISG)                              | $\frac{1}{3}$ | 0.23     | 0.60 | 19 | 18.47    | 53.24 | .08  |  |
| Minutes per each participant                      | $\frac{1}{3}$ | 0.03     | 0.04 | 19 | 0.07     | 0.07  | .054 |  |
| <b>Time &amp; Sessions</b>                        |               |          |      |    |          |       |      |  |
| Minutes used per session                          | $\frac{1}{3}$ | 3.75     | 8.37 | 19 | 7.61     | 11.82 | .11  |  |
| <b>Viewing</b>                                    |               |          |      |    |          |       |      |  |
| Post viewed                                       | $\frac{1}{3}$ | 4.00     | 5.74 | 19 | 21.58    | 40.40 | .50  |  |
| Percent who viewed at least once                  | $\frac{1}{3}$ | (46.156) | (6)  | 19 | (57.898) | (11)  | .51  |  |
| Post viewed by each participant who registered    | $\frac{1}{3}$ | 0.15     | 0.21 | 19 | 0.80     | 1.50  | .50  |  |
| Boards viewed                                     | $\frac{1}{3}$ | 0.69     | 0.85 | 19 | 1.53     | 1.87  | .27  |  |
| Boards viewed by each participant who registered  | $\frac{1}{3}$ | 0.03     | 0.03 | 19 | 0.06     | 0.07  | .27  |  |
| <b>Posting</b>                                    |               |          |      |    |          |       |      |  |
| Data Submitted                                    | $\frac{1}{3}$ | 0.54     | 1.94 | 19 | 7.53     | 15.09 | .03  |  |
| Post attempted                                    | $\frac{1}{3}$ | 0.23     | 0.83 | 19 | 5.21     | 11.54 | .052 |  |
| Percent of those who attempted at least once      | $\frac{1}{3}$ | (7.698)  | (1)  | 19 | (42.118) | (2)   | .050 |  |
| Post attempted by each participant who registered | $\frac{1}{3}$ | 0.01     | 0.03 | 19 | 0.19     | 0.43  | .052 |  |
| Post posted                                       | $\frac{1}{3}$ | 0.00     | 0.00 | 19 | 0.26     | 0.93  | .23  |  |
| Percent of those who posted at least once         | $\frac{1}{3}$ | (0.001)  | (0)  | 19 | (10.531) | (2)   | .50  |  |
| Posts posted by each participant who registered   | $\frac{1}{3}$ | 0.00     | 0.00 | 19 | 0.01     | 0.03  | .23  |  |
| <b>Portal &amp; ISG</b>                           |               |          |      |    |          |       |      |  |
| Visited Portal or Registered ISG                  | $\frac{1}{3}$ | (46.151) | (6)  | 19 | (78.959) | (15)  | .055 |  |
| Participants who visited Portal                   | $\frac{1}{3}$ | (46.151) | (6)  | 18 | (73.684) | (14)  | .11  |  |
| Participants who registered ISG                   | $\frac{1}{3}$ | (46.151) | (6)  | 19 | (57.898) | (11)  | .51  |  |

**Table 2.** Predictors of Time on Site

| <b>Predictor</b>      |          |                                  |           | <b>Model 1</b> |           | <b>Model 2</b> |             |           |                |
|-----------------------|----------|----------------------------------|-----------|----------------|-----------|----------------|-------------|-----------|----------------|
| <b>s</b>              | <i>N</i> | <i>Mean/</i><br><i>(Percent)</i> | <i>SD</i> | <i>Beta</i>    | <i>SE</i> | <i>P-value</i> | <i>Beta</i> | <i>SE</i> | <i>P-value</i> |
| <b>Mood</b>           |          |                                  |           |                |           |                |             |           |                |
| Baseline PHQ-9        | 48       | 13.07                            | 4.44      | -0.01          | 0.07      | .92            |             |           |                |
| Baseline CESD 10      | 43       | 9.19                             | 4.64      | 0.05           | 0.06      | .40            |             |           |                |
| <b>Demographics</b>   |          |                                  |           |                |           |                |             |           |                |
| Age                   | 48       | 36.44                            | 15.98     | 0.01           | 0.02      | .65            |             |           |                |
| Male                  | 48       | (31.25)                          | (15)      | 0.22           | 0.63      | .73            |             |           |                |
| College Graduates*    | 48       | (41.672)                         | (40)      | 0.34           | 0.59      | .58            |             |           |                |
| Income                | 33       | 45407.70                         | 59496.98  | -1.11E-06      | 6.69E-06  | .87            |             |           |                |
| <b>Social factors</b> |          |                                  |           |                |           |                |             |           |                |

|                                                                                                            |    |      |      |       |      |      |       |      |     |
|------------------------------------------------------------------------------------------------------------|----|------|------|-------|------|------|-------|------|-----|
| Loneliness                                                                                                 | 34 | 1.18 | 0.97 | -0.30 | 0.33 | .37  |       |      |     |
| Self-efficacy scale                                                                                        | 45 | 0.44 | 0.87 | 0.49  | 0.35 | .17  |       |      |     |
| <b>Attitudes toward Internet including Self-Determination Theory</b>                                       |    |      |      |       |      |      |       |      |     |
| <b>Autonomy seeking</b>                                                                                    |    |      |      |       |      |      |       |      |     |
| My identity to be anonymous while I am exploring concerns on the Internet                                  | 47 | 3.85 | 1.23 | 0.03  | 0.24 | .89  |       |      |     |
| I like the idea that I am in control of my experience on the internet                                      | 46 | 4.28 | 0.78 | 0.60  | 0.39 | .13  |       |      |     |
| <b>Connection seeking</b>                                                                                  |    |      |      |       |      |      |       |      |     |
| Able to help others by sharing my experiences on the Internet                                              | 47 | 3.53 | 1.08 | 0.31  | 0.27 | .25  |       |      |     |
| Help others by sharing my experiences on the Internet                                                      | 48 | 3.63 | 1.14 | 0.16  | 0.26 | .54  |       |      |     |
| <b>Competence Seeking</b>                                                                                  |    |      |      |       |      |      |       |      |     |
| Learn about depression treatment on the Internet                                                           | 48 | 3.94 | 0.78 | -0.32 | 0.38 | .41  |       |      |     |
| Able to learn about the experiences of others on the Internet                                              | 48 | 4.06 | 0.91 | -0.18 | 0.32 | .58  |       |      |     |
| Helpful to learn about the experiences of others on the Internet                                           | 47 | 3.62 | 1.17 | 0.11  | 0.26 | .67  |       |      |     |
| <b>Concern for adverse experiences</b>                                                                     |    |      |      |       |      |      |       |      |     |
| Upset if I read troubling comments about depression on the internet                                        | 47 | 3.21 | 1.25 | -0.16 | 0.24 | .51  |       |      |     |
| I might read troubling comments about depression on the internet                                           | 48 | 3.67 | 1.12 | -0.58 | 0.25 | .03  | -0.62 | 0.28 | .03 |
| <b>Preventive health model questions</b>                                                                   |    |      |      |       |      |      |       |      |     |
| <b>Beliefs about intervention</b>                                                                          |    |      |      |       |      |      |       |      |     |
| Participating in a depression Internet social support site is an important thing to do                     | 46 | 3.59 | 1.02 | 0.58  | 0.29 | .049 | 0.27  | 0.32 | .40 |
| A depression Internet social support site makes sense to me                                                | 46 | 3.83 | 1.06 | 0.16  | 0.29 | .57  |       |      |     |
| Depression can be treated successfully                                                                     | 46 | 4.15 | 0.87 | -0.07 | 0.35 | .85  |       |      |     |
| Going through a depression internet social support site will help me deal with stress or depression        | 46 | 3.50 | 0.98 | 0.38  | 0.31 | .22  |       |      |     |
| <b>Attitudes toward intervention</b>                                                                       |    |      |      |       |      |      |       |      |     |
| The benefits of a depression internet social support site outweigh any difficulty                          | 46 | 3.48 | 0.86 | 0.66  | 0.34 | .06  |       |      |     |
| A depression internet social support site could help me deal with depression                               | 46 | 3.67 | 1.06 | 0.25  | 0.29 | .39  |       |      |     |
| Help myself overcome depression by visiting a social support Internet site                                 | 46 | 3.37 | 1.08 | 0.39  | 0.28 | .17  |       |      |     |
| Going through a depression Internet social support site is too much trouble                                | 46 | 2.26 | 0.80 | -0.37 | 0.38 | .34  |       |      |     |
| A depression internet social support site would be emotionally painful                                     | 46 | 2.17 | 0.88 | -0.23 | 0.35 | .51  |       |      |     |
| Going to a depression internet social support site would be embarrassing                                   | 45 | 2.04 | 0.95 | 0.05  | 0.33 | .87  |       |      |     |
| I would be better off if I didn't go to this depression Internet support site                              | 46 | 2.04 | 0.84 | -0.36 | 0.36 | .32  |       |      |     |
| <b>Social norms</b>                                                                                        |    |      |      |       |      |      |       |      |     |
| My close friends support me going to depression social support Internet site                               | 45 | 2.78 | 1.13 | 0.17  | 0.27 | .55  |       |      |     |
| I want to do what my close friends think I should do                                                       | 45 | 2.82 | 0.98 | 0.24  | 0.31 | .45  |       |      |     |
| My immediate family supports me going to a depression Internet social support site                         | 45 | 2.71 | 1.25 | 0.30  | 0.24 | .23  |       |      |     |
| I want to do what the members of my immediate family think I should do                                     | 43 | 2.98 | 1.03 | 0.54  | 0.30 | .08  |       |      |     |
| Physicians and other health care professionals want me to go to an Internet intervention site              | 45 | 3.02 | 1.20 | 0.47  | 0.25 | .07  |       |      |     |
| I want to do what the physicians and other health care professionals want me to do                         | 45 | 3.40 | 0.91 | 0.80  | 0.32 | .02  | 0.45  | 0.36 | .23 |
| <b>Self-efficacy</b>                                                                                       |    |      |      |       |      |      |       |      |     |
| Visiting this depression Internet social support site is an easy thing to do                               | 46 | 3.89 | 0.97 | 0.62  | 0.30 | .047 | 0.43  | 0.29 | .16 |
| Arranging my schedule to visit depression internet social support site would be an easy thing for me to do | 46 | 4.00 | 0.79 | 0.35  | 0.38 | .37  |       |      |     |
| <b>Transtheoretical Model of Change/MI</b>                                                                 |    |      |      |       |      |      |       |      |     |
| Importance                                                                                                 | 48 | 7.38 | 2.83 | 0.14  | 0.10 | .17  |       |      |     |

|                                                          |    |      |      |       |      |     |  |  |  |
|----------------------------------------------------------|----|------|------|-------|------|-----|--|--|--|
| Ability                                                  | 48 | 6.81 | 2.73 | -0.11 | 0.11 | .32 |  |  |  |
| Readiness                                                | 48 | 7.81 | 2.73 | 0.04  | 0.11 | .72 |  |  |  |
| <b>Participation in decision making</b>                  |    |      |      |       |      |     |  |  |  |
| Talk to my providers to include my treatment preferences | 17 | 4.12 | 0.99 | 0.24  | 0.47 | .61 |  |  |  |

**Table 3.** Predictors of Posts Viewed

|                                                                           |          |                            |           | <b>Model 1</b> |           |                | <b>Model 2</b> |           |                |
|---------------------------------------------------------------------------|----------|----------------------------|-----------|----------------|-----------|----------------|----------------|-----------|----------------|
| <b><u>Predictors</u></b>                                                  | <i>N</i> | <i>Mean/<br/>(Percent)</i> | <i>SD</i> | <i>Beta</i>    | <i>SE</i> | <i>P-value</i> | <i>Beta</i>    | <i>SE</i> | <i>P-value</i> |
| <b>Mood</b>                                                               |          |                            |           |                |           |                |                |           |                |
| Baseline PHQ-9                                                            | 48       | 13.07                      | 4.44      | 0.06           | 0.08      | .48            |                |           |                |
| Baseline CESD                                                             | 43       | 9.19                       | 4.64      | 0.19           | 0.14      | .17            |                |           |                |
| <b>Demographics</b>                                                       |          |                            |           |                |           |                |                |           |                |
| Age                                                                       | 48       | 36.44                      | 15.98     | 0.01           | 0.02      | .67            |                |           |                |
| Male                                                                      | 48       | -31.25                     | -15       | 0.97           | 0.75      | .20            |                |           |                |
| College Graduates                                                         | 48       | -41.67                     | -40       | 0.78           | 0.71      | .27            |                |           |                |
| Income                                                                    | 33       | 45407.7                    | 59496.98  | -8.76e         | 6.00E+00  | 6.00           |                |           |                |
| <b>Social factors</b>                                                     |          |                            |           |                |           |                |                |           |                |
| Loneliness                                                                | 34       | 1.18                       | 0.97      | 0.2            | 0.34      | .55            |                |           |                |
| Self-efficacy scale                                                       | 45       | 0.44                       | 0.87      | 0.63           | 0.37      | .09            |                |           |                |
| <b>Attitudes toward Internet including Self-Determination Theory</b>      |          |                            |           |                |           |                |                |           |                |
| <b>Autonomy seeking</b>                                                   |          |                            |           |                |           |                |                |           |                |
| My identity to be anonymous while I am exploring concerns on the Internet | 47       | 3.85                       | 1.23      | 0.62           | 0.48      | .20            |                |           |                |
| I like the idea that I am in control of my experience on the internet     | 46       | 4.28                       | 0.78      | -0.25          | 0.8       | .76            |                |           |                |
| <b>Connection seeking</b>                                                 |          |                            |           |                |           |                |                |           |                |
| Able to help others by sharing my experiences on the Internet             | 47       | 3.53                       | 1.08      | 0.04           | 0.42      | .93            |                |           |                |
| Help others by sharing my experiences on the Internet                     | 48       | 3.63                       | 1.14      | -0.01          | 0.29      | .96            |                |           |                |
| <b>Competence Seeking</b>                                                 |          |                            |           |                |           |                |                |           |                |
| Learn about depression treatment on the Internet                          | 48       | 3.94                       | 0.78      | -0.43          | 0.41      | .29            |                |           |                |
| Able to learn about the experiences of others on the Internet             | 48       | 4.06                       | 0.91      | -0.15          | 0.45      | .73            |                |           |                |
| Helpful to learn about the experiences of others on the Internet          | 47       | 3.62                       | 1.17      | 0.01           | 0.29      | .98            |                |           |                |
| <b>Concern for adverse experiences</b>                                    |          |                            |           |                |           |                |                |           |                |
| Upset if I read troubling comments about depression on the internet       | 47       | 3.21                       | 1.25      | 9.67E-04       | 0.39      | 1.00           |                |           |                |
| I might read troubling comments about depression on the internet          | 48       | 3.67                       | 1.12      | -0.18          | 0.43      | .67            |                |           |                |

|                                                                                                     |    |      |      |       |      |     |      |      |     |
|-----------------------------------------------------------------------------------------------------|----|------|------|-------|------|-----|------|------|-----|
| <b>Preventive Health Model</b>                                                                      |    |      |      |       |      |     |      |      |     |
| <b>Beliefs about intervention</b>                                                                   |    |      |      |       |      |     |      |      |     |
| Participating in a depression Internet social support site is an important thing to do              | 46 | 3.59 | 1.02 | 0.58  | 0.49 | .24 |      |      |     |
| A depression internet social support site makes sense to me                                         | 46 | 3.83 | 1.06 | -0.03 | 0.4  | .94 |      |      |     |
| Depression can be treated successfully                                                              | 46 | 4.15 | 0.87 | -0.24 | 0.64 | .71 |      |      |     |
| Going through a depression internet social support site will help me deal with stress or depression | 46 | 3.5  | 0.98 | 0.12  | 0.47 | .81 |      |      |     |
| <b>Attitudes toward intervention</b>                                                                |    |      |      |       |      |     |      |      |     |
| The benefits of a depression internet social support site outweigh any difficulty                   | 46 | 3.48 | 0.86 | 0.04  | 0.39 | .92 |      |      |     |
| A depression internet social support site could help me deal with depression                        | 46 | 3.67 | 1.06 | -0.39 | 0.5  | .44 |      |      |     |
| Help myself overcome depression by visiting a social support Internet site                          | 46 | 3.37 | 1.08 | 0.09  | 0.46 | .84 |      |      |     |
| Going through a depression Internet social support site is too much trouble                         | 46 | 2.26 | 0.8  | 0.37  | 0.43 | .40 |      |      |     |
| A depression internet social support site would be emotionally painful                              | 46 | 2.17 | 0.88 | -0.17 | 0.38 | .65 |      |      |     |
| Going to a depression internet social support site would be embarrassing                            | 45 | 2.04 | 0.95 | 0.56  | 0.37 | .13 |      |      |     |
| I would be better off if I didn't go to this depression Internet support site                       | 46 | 2.04 | 0.84 | 0.31  | 0.66 | .64 |      |      |     |
| <b>Social norms</b>                                                                                 |    |      |      |       |      |     |      |      |     |
| My close friends support me going to depression social support Internet site                        | 45 | 2.78 | 1.13 | 0.85  | 0.4  | .03 | 0.13 | 0.55 | .81 |
| I want to do what my close friends think I should do                                                | 45 | 2.82 | 0.98 | 0.93  | 0.53 | .08 |      |      |     |
| My immediate family supports me going to a depression Internet social support site                  | 45 | 2.71 | 1.25 | 0.51  | 0.34 | .13 |      |      |     |
| I want to do what the members of my immediate family think I should do                              | 43 | 2.98 | 1.03 | 0.3   | 0.46 | .52 |      |      |     |
| Physicians and other health care professionals want me to go to an Internet intervention site       | 45 | 3.02 | 1.2  | 0.88  | 0.33 | .01 | 0.79 | 0.49 | .11 |
| I want to do what the physicians and other health care professionals want me to do                  | 45 | 3.4  | 0.91 | 0.65  | 0.49 | .19 |      |      |     |
| <b>Self-efficacy</b>                                                                                |    |      |      |       |      |     |      |      |     |
| Visiting this depression Internet social support site is an easy thing to do                        | 46 | 3.89 | 0.97 | 0.71  | 0.57 | .21 |      |      |     |

|                                                                                                            |    |      |      |      |      |     |  |  |  |
|------------------------------------------------------------------------------------------------------------|----|------|------|------|------|-----|--|--|--|
| Arranging my schedule to visit depression internet social support site would be an easy thing for me to do | 46 | 4    | 0.79 | 0.15 | 0.66 | .82 |  |  |  |
| <b>Transtheoretical Model of Change/MI</b>                                                                 |    |      |      |      |      |     |  |  |  |
| Importance                                                                                                 | 48 | 7.38 | 2.83 | 0.16 | 0.13 | .22 |  |  |  |
| Ability                                                                                                    | 48 | 6.81 | 2.73 | 0.06 | 0.15 | .68 |  |  |  |
| Readiness                                                                                                  | 48 | 7.81 | 2.73 | 0.1  | 0.13 | .43 |  |  |  |
| <b>Participation in decision making</b>                                                                    |    |      |      |      |      |     |  |  |  |
| Talk to my providers to include my treatment preferences                                                   | 17 | 4.12 | 0.99 | 0.54 | 0.7  | .44 |  |  |  |

**Table 4.** Predictors of Posts Attempted

|                                                                           |          |                        |           | <b>Model 1</b> |           |                | <b>Model 2</b> |           |                |
|---------------------------------------------------------------------------|----------|------------------------|-----------|----------------|-----------|----------------|----------------|-----------|----------------|
| <b>Predictors</b>                                                         | <i>N</i> | <i>Mean/ (Percent)</i> | <i>SD</i> | <i>Beta</i>    | <i>SE</i> | <i>P-value</i> | <i>Beta</i>    | <i>SE</i> | <i>P-value</i> |
| <b>Mood</b>                                                               |          |                        |           |                |           |                |                |           |                |
| Baseline PHQ-9                                                            | 48       | 13.07                  | 4.44      | 0.32           | 0.26      | .22            |                |           |                |
| Baseline CESD 10                                                          | 43       | 9.19                   | 4.64      | 0.28           | 0.15      | .06            |                |           |                |
| <b>Demographics</b>                                                       |          |                        |           |                |           |                |                |           |                |
| Age                                                                       | 48       | 36.44                  | 15.98     | 0.04           | 0.04      | .33            |                |           |                |
| Male                                                                      | 48       | -31.25                 | -15       | 1.46           | 1.29      | .26            |                |           |                |
| College Graduates                                                         | 48       | -41.67                 | -40       | -0.58          | 1.23      | .64            |                |           |                |
| Income                                                                    | 33       | 45407.7                | 59496.98  | -2.28E-05      | 3.58E-05  | .52            |                |           |                |
| <b>Social factors</b>                                                     |          |                        |           |                |           |                |                |           |                |
| Loneliness                                                                | 34       | 1.18                   | 0.97      | -0.77          | 0.68      | .26            |                |           |                |
| Self-efficacy scale                                                       | 45       | 0.44                   | 0.87      | 1.56           | 0.76      | <b>.04</b>     | 1.5            | 0.77      | <b>.05</b>     |
| <b>Attitudes toward Internet including Self-Determination Theory</b>      |          |                        |           |                |           |                |                |           |                |
| <b>Autonomy seeking</b>                                                   |          |                        |           |                |           |                |                |           |                |
| My identity to be anonymous while I am exploring concerns on the Internet | 47       | 3.85                   | 1.23      | 0.13           | 0.74      | .86            |                |           |                |
| I like the idea that I am in control of my experience on the internet     | 46       | 4.28                   | 0.78      | -0.41          | 1.33      | .76            |                |           |                |
| <b>Connection seeking</b>                                                 |          |                        |           |                |           |                |                |           |                |
| Able to help others by sharing my experiences on the Internet             | 47       | 3.53                   | 1.08      | 2.05           | 1.07      | .06            |                |           |                |
| Help others by sharing my experiences on the Internet                     | 48       | 3.63                   | 1.14      | 0.45           | 0.55      | .42            |                |           |                |
| <b>Competence Seeking</b>                                                 |          |                        |           |                |           |                |                |           |                |
| Learn about depression treatment on the Internet                          | 48       | 3.94                   | 0.78      | -0.23          | 0.68      | .74            |                |           |                |
| Able to learn about the experiences of others on the Internet             | 48       | 4.06                   | 0.91      | 0.75           | 1.05      | .47            |                |           |                |

|                                                                                                            |    |      |      |           |      |             |      |      |     |
|------------------------------------------------------------------------------------------------------------|----|------|------|-----------|------|-------------|------|------|-----|
| Helpful to learn about the experiences of others on the Internet                                           | 47 | 3.62 | 1.17 | 0.65      | 0.58 | .26         |      |      |     |
| <b>Concern for adverse experiences</b>                                                                     |    |      |      |           |      |             |      |      |     |
| Upset if I read troubling comments about depression on the internet                                        | 47 | 3.21 | 1.25 | -0.56     | 0.53 | .29         |      |      |     |
| I might read troubling comments about depression on the internet                                           | 48 | 3.67 | 1.12 | -0.41     | 0.69 | .56         |      |      |     |
| <b>Preventive Health Model</b>                                                                             |    |      |      |           |      |             |      |      |     |
| <b>Beliefs about intervention</b>                                                                          |    |      |      |           |      |             |      |      |     |
| Participating in a depression Internet social support site is an important thing to do                     | 46 | 3.59 | 1.02 | 0.22      | 0.59 | .71         |      |      |     |
| A depression internet social support site makes sense to me                                                | 46 | 3.83 | 1.06 | 0.17      | 0.53 | .75         |      |      |     |
| Depression can be treated successfully                                                                     | 46 | 4.15 | 0.87 | -1.48     | 1.29 | .25         |      |      |     |
| Going through a depression internet social support site will help me deal with stress or depression        | 46 | 3.5  | 0.98 | 1.04      | 1.05 | .32         |      |      |     |
| <b>Attitudes toward intervention</b>                                                                       |    |      |      |           |      |             |      |      |     |
| The benefits of a depression internet social support site outweigh any difficulty                          | 46 | 3.48 | 0.86 | 0.33      | 0.71 | .64         |      |      |     |
| A depression internet social support site could help me deal with depression                               | 46 | 3.67 | 1.06 | -0.12     | 0.74 | .87         |      |      |     |
| Help myself overcome depression by visiting a social support Internet site                                 | 46 | 3.37 | 1.08 | 0.17      | 0.73 | .81         |      |      |     |
| Going through a depression Internet social support site is too much trouble                                | 46 | 2.26 | 0.8  | 0.6       | 0.89 | .50         |      |      |     |
| A depression internet social support site would be emotionally painful                                     | 46 | 2.17 | 0.88 | -0.45     | 0.62 | .47         |      |      |     |
| Going to a depression internet social support site would be embarrassing                                   | 45 | 2.04 | 0.95 | 0.44      | 0.53 | .41         |      |      |     |
| I would be better off if I didn't go to this depression Internet support site                              | 46 | 2.04 | 0.84 | -0.57     | 0.84 | .50         |      |      |     |
| <b>Social norms</b>                                                                                        |    |      |      |           |      |             |      |      |     |
| My close friends support me going to depression social support Internet site                               | 45 | 2.78 | 1.13 | 2.04      | 1.07 | .06         |      |      |     |
| I want to do what my close friends think I should do                                                       | 45 | 2.82 | 0.98 | -0.25     | 1.09 | .82         |      |      |     |
| My immediate family supports me going to a depression Internet social support site                         | 45 | 2.71 | 1.25 | 1.58      | 0.75 | <b>.04</b>  | 1.07 | 0.57 | .06 |
| I want to do what the members of my immediate family think I should do                                     | 43 | 2.98 | 1.03 | 0.25      | 1.08 | .81         |      |      |     |
| Physicians and other health care professionals want me to go to an Internet intervention site              | 45 | 3.02 | 1.2  | 0.81      | 0.41 | <b>.046</b> | 0.23 | 0.43 | .60 |
| I want to do what the physicians and other health care professionals want me to do                         | 45 | 3.4  | 0.91 | 1.28      | 0.67 | .06         |      |      |     |
| <b>Self-efficacy</b>                                                                                       |    |      |      |           |      |             |      |      |     |
| Visiting this depression Internet social support site is an easy thing to do                               | 46 | 3.89 | 0.97 | -0.02     | 1.02 | .99         |      |      |     |
| Arranging my schedule to visit depression internet social support site would be an easy thing for me to do | 46 | 4    | 0.79 | -9.34E-15 | 1.59 | 1.00        |      |      |     |
| <b>Transtheoretical Model of Change/MI</b>                                                                 |    |      |      |           |      |             |      |      |     |

|                                                          |    |      |      |      |      |     |  |  |  |
|----------------------------------------------------------|----|------|------|------|------|-----|--|--|--|
| Importance                                               | 48 | 7.38 | 2.83 | 0.48 | 0.36 | .18 |  |  |  |
| Ability                                                  | 48 | 6.81 | 2.73 | 0.11 | 0.2  | .57 |  |  |  |
| Readiness                                                | 48 | 7.81 | 2.73 | 0.65 | 0.36 | .07 |  |  |  |
| <b>Participation in decision making</b>                  |    |      |      |      |      |     |  |  |  |
| Talk to my providers to include my treatment preferences | 17 | 4.12 | 0.99 | 0.94 | 1.81 | .60 |  |  |  |
